# Supplementary material for: The diagnostic accuracy of lung auscultation in adult patients with acute pulmonary pathologies: a meta-analysis
Source: PubMed Central journal article supplement (PMC7192898; doi:10.1038/s41598-020-64405-6), 2020-04-30
Supplement: 41598_2020_64405_MOESM4_ESM.pdf [file 41598_2020_64405_MOESM4_ESM.pdf]

**Title**

The diagnostic accuracy of lung auscultation in adult patients with acute pulmonary pathologies: a meta-analysis.

**Authors**

Luca Arts<sup>1,2</sup> (MD), Endry Hartono Taslim Lim<sup>1,2</sup> (MD), Peter Marinus van de Ven<sup>3</sup> (PhD, MSc, MA), Leo Heunks<sup>1,2,4</sup> (PhD, MD), Pieter Roel Tuinman<sup>1,2,4,\*</sup> (PhD, MD)

<sup>1</sup>Amsterdam UMC, location Vrije Universiteit Amsterdam, Department of Intensive Care Medicine, <sup>2</sup>Research Vrije Universiteit Intensive Care (REVIVE) and <sup>4</sup>Amsterdam Cardiovascular Sciences, De Boelelaan 1117, 1081 HV, Amsterdam, The Netherlands

<sup>3</sup>Amsterdam UMC, Vrije Universiteit Amsterdam, Department of Biostatistics and Epidemiology, De Boelelaan 1117, 1081 HV, Amsterdam, The Netherlands

**Corresponding author\***

Dr. P. R. Tuinman, Amsterdam UMC, Vrije Universiteit Amsterdam, Department of Intensive Care Medicine, De Boelelaan 1117, 1081 HV Amsterdam, The Netherlands

E: [p.tuinman@amsterdamumc.nl](mailto:p.tuinman@amsterdamumc.nl), T: +31204444444

**Supplementary Appendix B – QUADAS-2: Risk of bias and applicability judgments: the four domains.**

**DOMAIN 1: PATIENT SELECTION**

**A. Risk of Bias**

*Describe methods of patient selection:*

|                                                          |                |
|----------------------------------------------------------|----------------|
| Was a consecutive or random sample of patients enrolled? | Yes/No/Unclear |
| Was a case-control design avoided?                       | Yes/No/Unclear |
| Did the study avoid inappropriate exclusions?            | Yes/No/Unclear |

**Could the selection of patients have introduced bias?                      RISK: LOW/HIGH/UNCLEAR**

**B. Concerns regarding applicability**

*Describe included patients (prior testing, presentation, intended use of index test and setting):*

**Is there concern that the included patients do not match the review question?                      CONCERN: LOW/HIGH/UNCLEAR**

**DOMAIN 2: INDEX TEST(S)**

**If more than one index test was used, please complete for each test.**

**A. Risk of Bias**

*Describe the index test and how it was conducted and interpreted:*

|                                                                                                     |                |
|-----------------------------------------------------------------------------------------------------|----------------|
| Were the index test results interpreted without knowledge of the results of the reference standard? | Yes/No/Unclear |
| If a threshold was used, was it pre-specified?                                                      | Yes/No/Unclear |

**Could the conduct or interpretation of the index test have introduced bias?                      RISK: LOW /HIGH/UNCLEAR**

**B. Concerns regarding applicability**

**Is there concern that the index test, its conduct, or interpretation differ from the review question                      CONCERN: LOW/HIGH/UNCLEAR**

### DOMAIN 3: REFERENCE STANDARD

#### A. Risk of Bias

*Describe the reference standard and how it was conducted and interpreted:*

Is the reference standard likely to correctly classify the target condition? Yes/No/Unclear

Were the reference standard results interpreted without knowledge of the results of the index test? Yes/No/Unclear

**Could the reference standard, its conduct, or its interpretation have introduced bias? RISK: LOW /HIGH/UNCLEAR**

#### B. Concerns regarding applicability

**Is there concern that the target condition as defined by the reference standard does not match the review question? CONCERN: LOW /HIGH/UNCLEAR**

### DOMAIN 4: FLOW AND TIMING

#### A. Risk of Bias

Describe any patients who did not receive the index test(s) and/or reference standard or who were excluded from the 2x2 table (refer to flow diagram):

Describe the time interval and any interventions between index test(s) and reference standard:

Was there an appropriate interval between index test(s) and reference standard? Yes/No/Unclear

Did all patients receive a reference standard? Yes/No/Unclear

Did patients receive the same reference standard? Yes/No/Unclear

Were all patients included in the analysis? Yes/No/Unclear

**Could the patient flow have introduced bias? RISK: LOW /HIGH/UNCLEAR**
